# Supplementary material for: Long-term physical activity: an exogenous risk factor for sporadic amyotrophic lateral sclerosis?
Source: PubMed Central journal article supplement (PMC4950417; doi:10.3109/21678421.2016.1154575), 2016-03-21
Supplement: iafd_a_1154575_sm3060.pdf [file iafd_a_1154575_sm3060.pdf]

Editor  
Amyotrophic Lateral Sclerosis and Frontotemporal Degeneration

3 December 2015

Dear Sir/Madam

**Harwood et al. Long-term physical activity: an exogenous risk factor for sporadic amyotrophic lateral sclerosis?**

I confirm that the analyses presented in this paper use valid statistical methods.

Yours faithfully



Stephen Sharp, MA MSc  
Senior Statistician
